# Supplementary material
Source: publisher figshare collection journal article supplement (https://acs.figshare.com/ndownloader/files/22734866)
Supplement: Supplementary file 1 [file 22734866]

## Supporting Information

# Kinetics of Coal Char Gasification with Fe-Based Oxygen Carriers under Pressured Conditions

*Xintong Guo, Guozhang Chang, Xiaoli Tan, Xiude Hu, Qingjie Guo\**

State Key Laboratory of High-efficiency Utilization of Coal and Green Chemical Engineering,  
Ningxia University, Yinchuan 750021, China

### Corresponding Author

Tel.: +86-951-2062835

Fax: +86-951-2062323

\*E-mail: qingjie\_guo@163.com

### List of table captions

**Figure S1.** XRD characterization of fresh 40 wt %  $\text{Fe}_2\text{O}_3/\text{Al}_2\text{O}_3$  oxygen carriers.

**Figure S2.** The corresponding linear velocities of different coal chars when the influence of external diffusion was overcome.

**Figure S3.** Linear relationship between  $1/r_g$  and  $1/C_{\text{H}_2\text{O},b}$ .

**Figure S4.** Linear relationship between  $\ln(k_i)$  and  $1/T$ .

**Figure S5.** Linear relationship of the oxygen carrier between  $\ln k_{red}$  and  $1/T$ .

**Figure S6.** Comparison of the gasification rates between experimental values and calculated values.

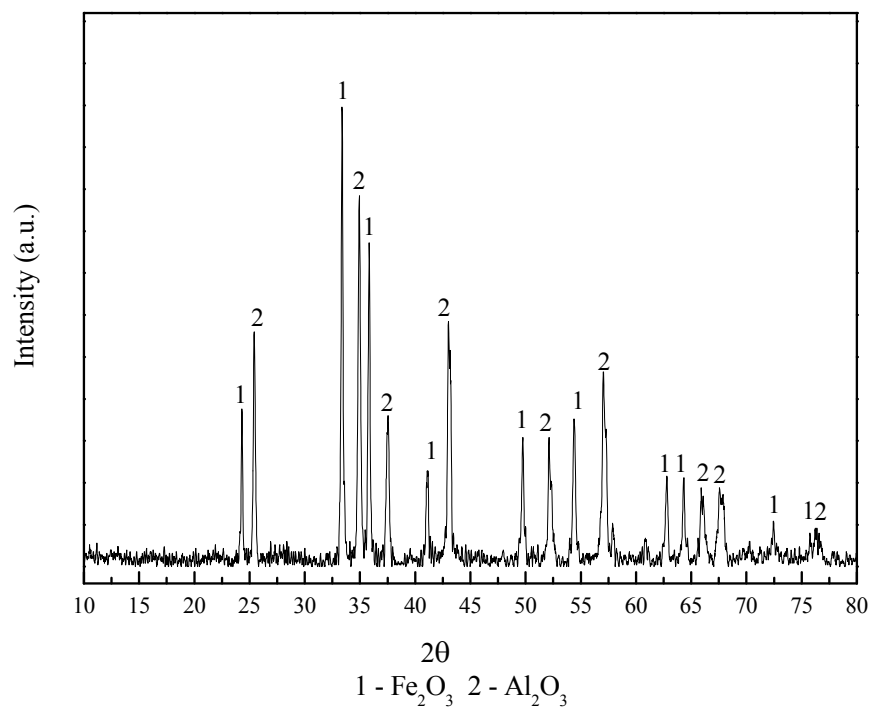

**Figure S1.** XRD characterization of fresh 40 wt% Fe<sub>2</sub>O<sub>3</sub>/Al<sub>2</sub>O<sub>3</sub> oxygen carriers.

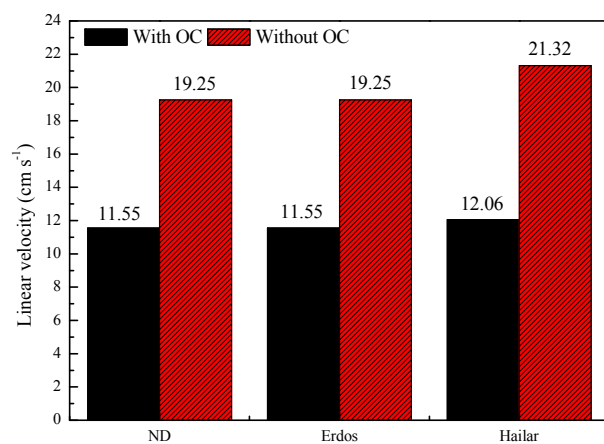

**Figure S2.** The corresponding linear velocities of different coal chars when the influence of external diffusion was overcome.

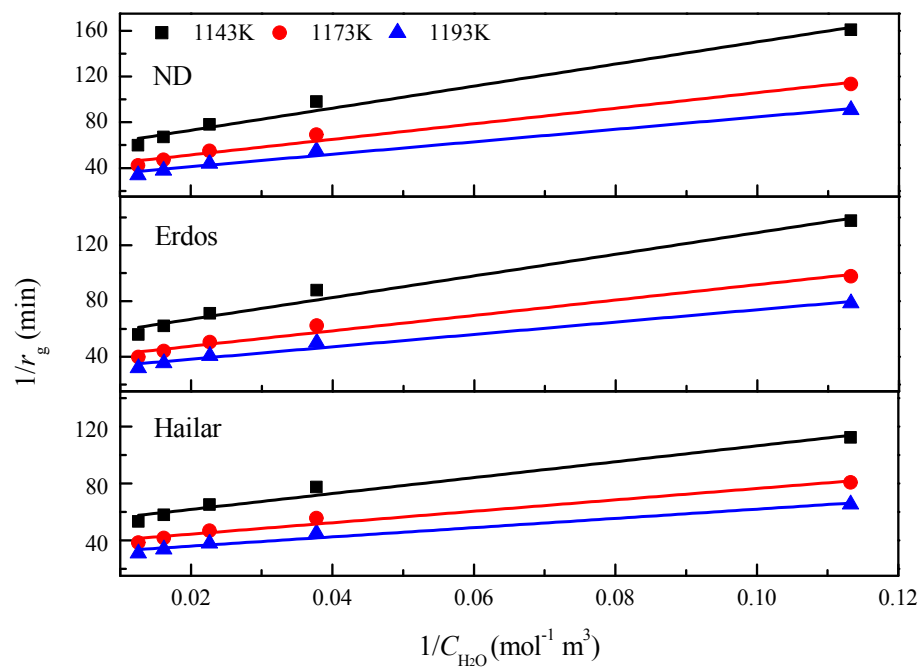

**Figure S3.** Linear relationship between  $1/r_g$  and  $1/C_{H_2O,b}$ .

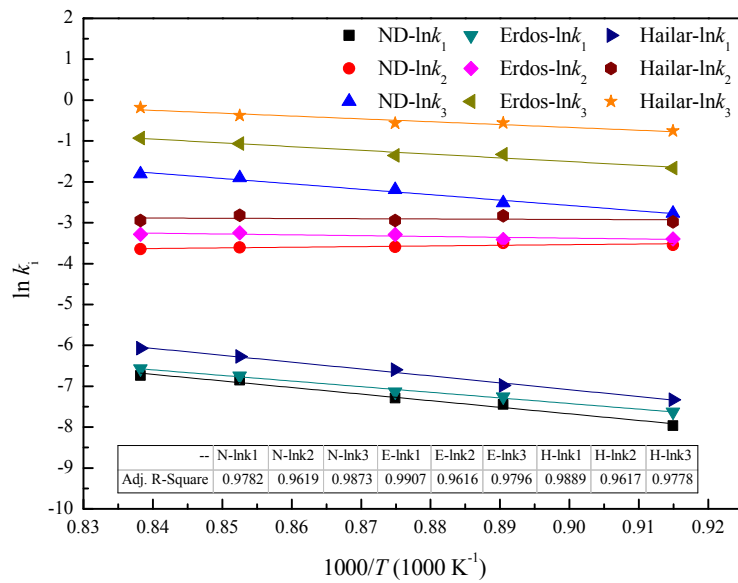

**Figure S4.** Linear relationship between  $\ln(k_i)$  and  $1/T$ .

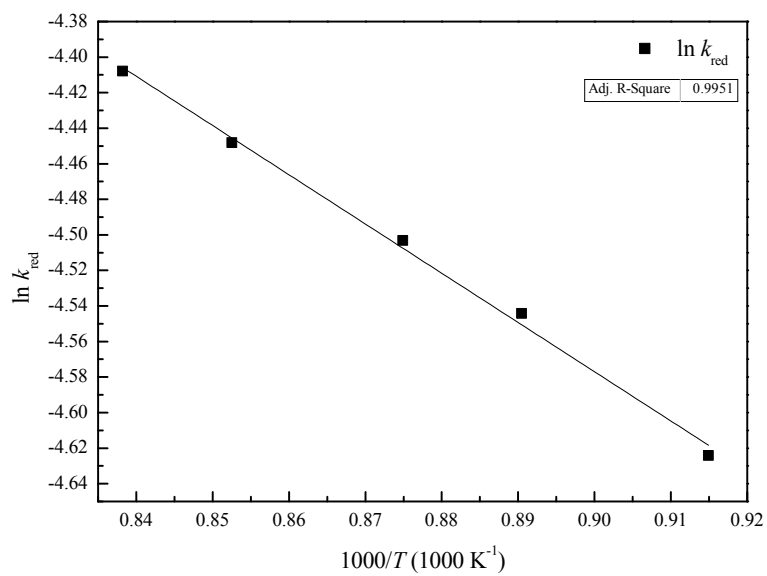

**Figure S5.** Linear relationship of the oxygen carrier between  $\ln k_{red}$  and  $1/T$ .

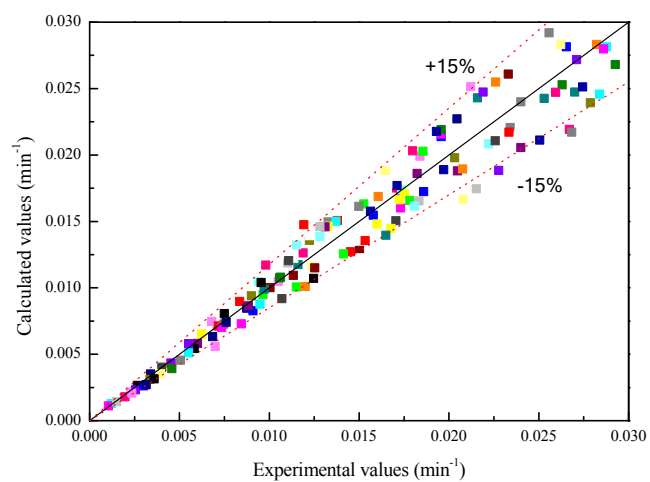

**Figure S6.** Comparison of the gasification rates between experimental values and calculated values.
